# Supplementary material
Source: PubMed Central journal article supplement (PMC5136800)
Supplement: NIHMS830235-supplement-Supplement.pdf [file NIHMS830235-supplement-Supplement.pdf]

A

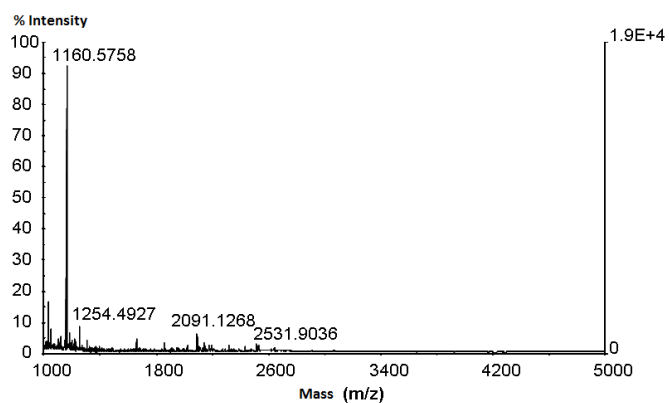

B

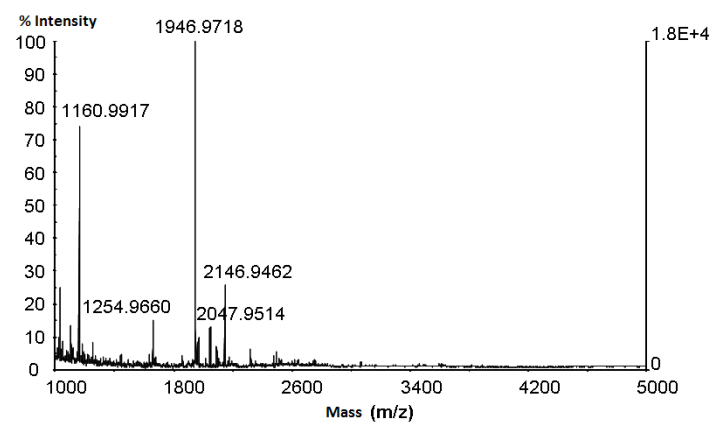

**Supplementary file S1** MALDI TOF MS spectra generated from preparative HPLC purified F2' (A) and F2 fractions (B) showing three ions at  $m/z$  1946.97, 2047.95 and 2146.94, only in (B) MS spectrum.

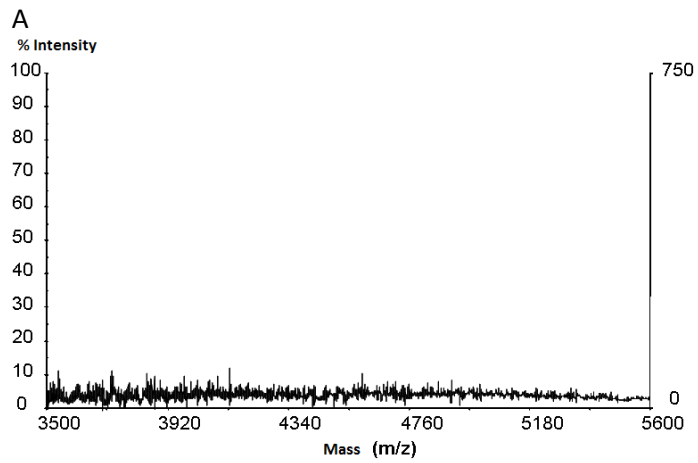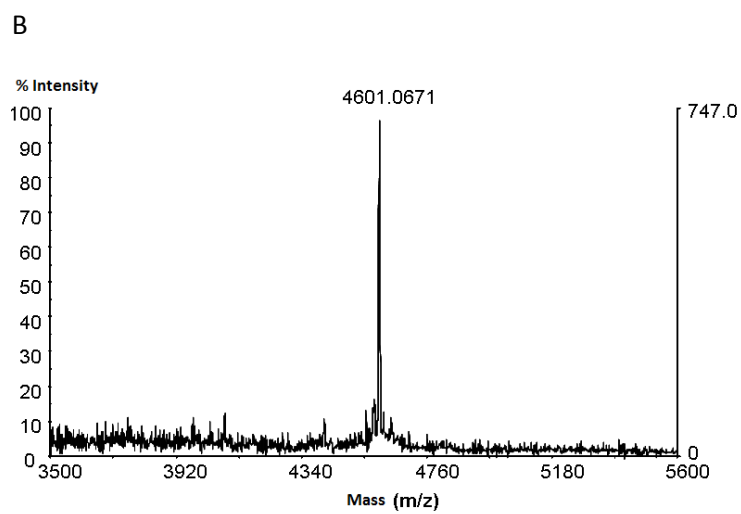

**Supplementary file S2** MALDI TOF MS spectra (zoom scan for the  $m/z$  range 3500-5600) generated from F2' (A) and F2 fractions (B) showing one ion at  $m/z$  4601.06, only in (B) MS spectrum.

A

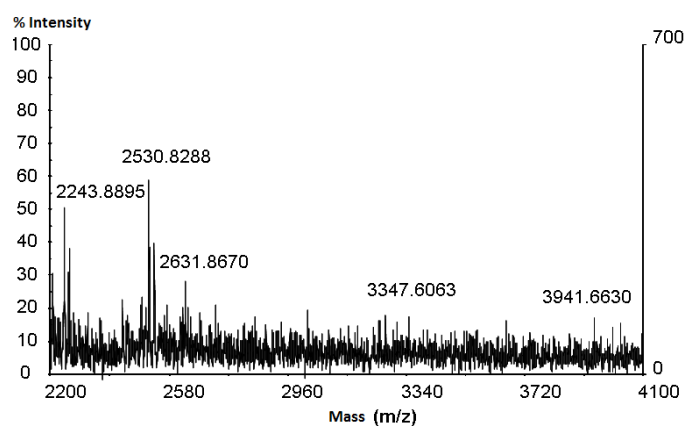

B

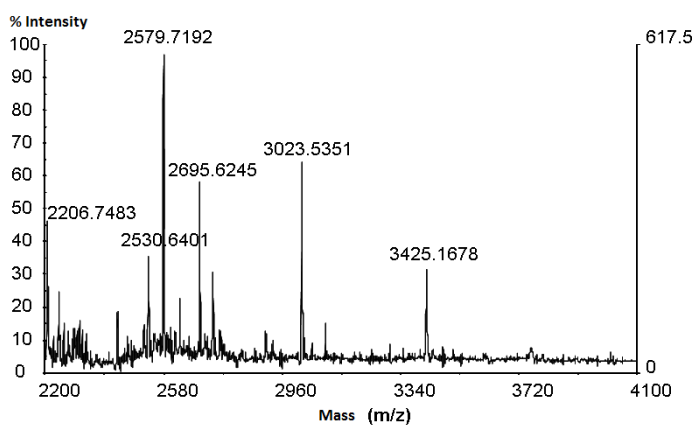

**Supplementary file S3** MALDI TOF MS spectra generated from preparative HPLC purified F2' (A) and F2 fractions (B) showing one ion at  $m/z$  2579.72, only in (B) MS spectrum.

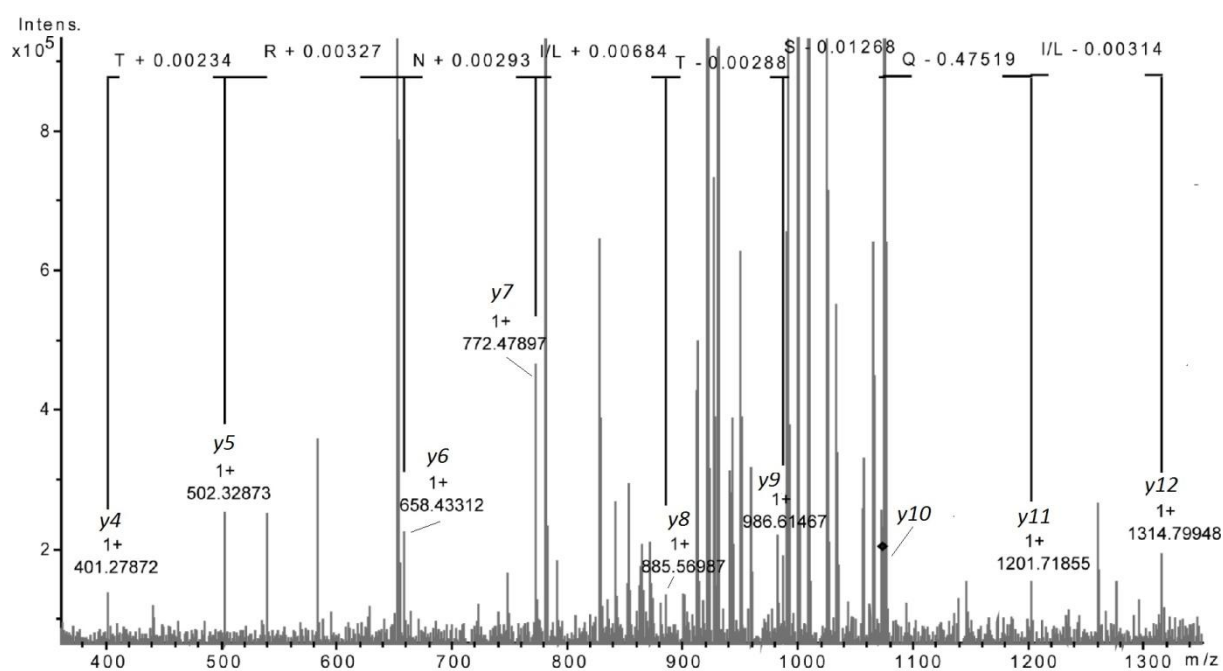

**Supplementary file S4** FT ICR CID spectrum of the  $[M + 2H]^{2+}$   $m/z$  1073.61 precursor ion (zoom scan for the  $m/z$  range 360–1340): singly charged  $y$ -ion series were observed ( $y$ -ions  $y_4$  to  $y_{12}$ ).

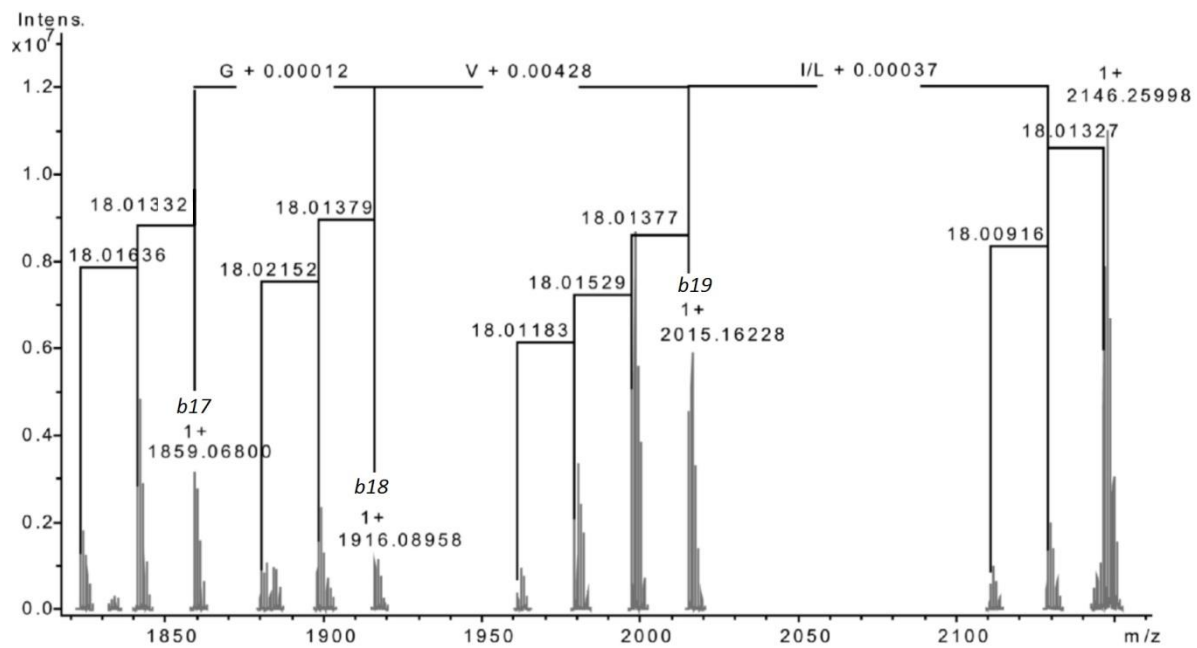

**Supplementary file S5** Charge deconvoluted positive ion ESI FT ICR mass spectrum of the  $[M + 2H]^{2+}$   $m/z$  1073.61 precursor ion (zoom scan for the  $m/z$  range 1820–1860). A *b*-ion series (*b*17 to *b*20, and with their water loss) were observed corresponding to

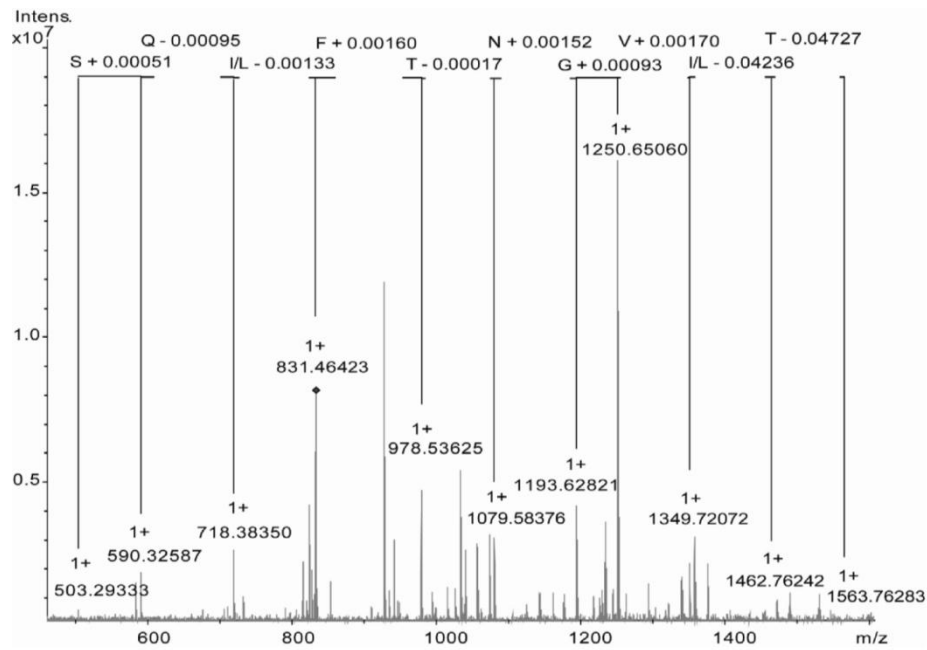

**Supplementary file S6** FTICR CID spectrum of the  $[M + 2H]^{2+}$  m/z 831.96 precursor ion (a fragment from the native peptide at  $[M + H]^+$  m/z 2146.94). De novo sequencing generated a second probable partial amino acid sequence.

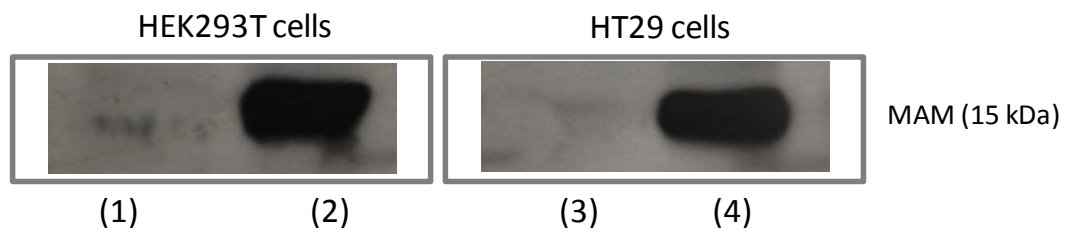

**Supplementary file S7** Western Blot detection with anti-flag antibody of MAM-flag protein in HEK293T and HT29 cells transfected with pLMAM (2, 4). No detection of MAM-flag was observed in cells transfected with pILEMPTY (1, 3).

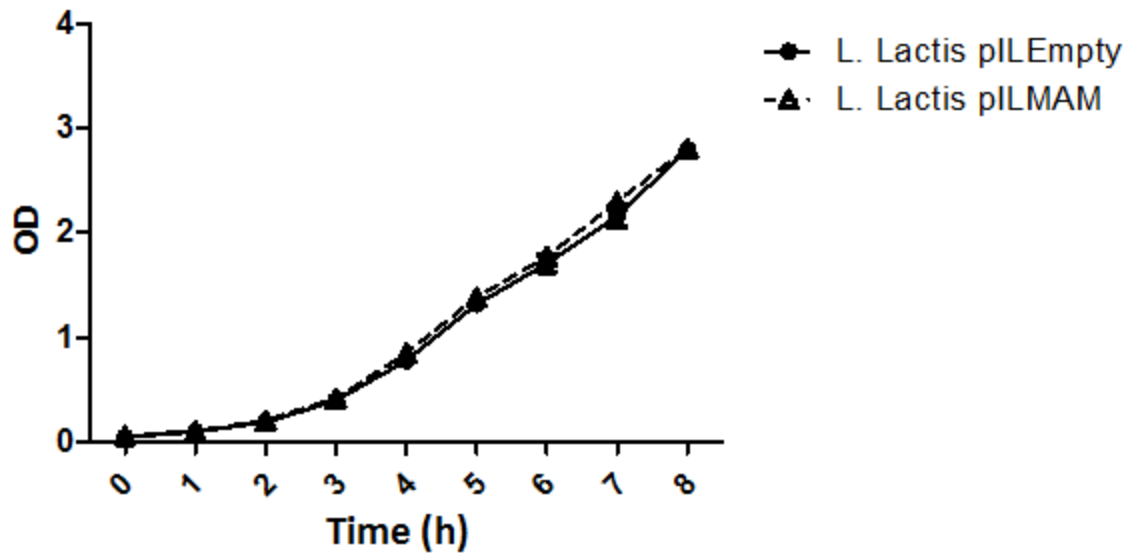

Supplementary file S8 Similar growth curves of *L. lactis* pLMAM and *L. lactis* pLEmpty



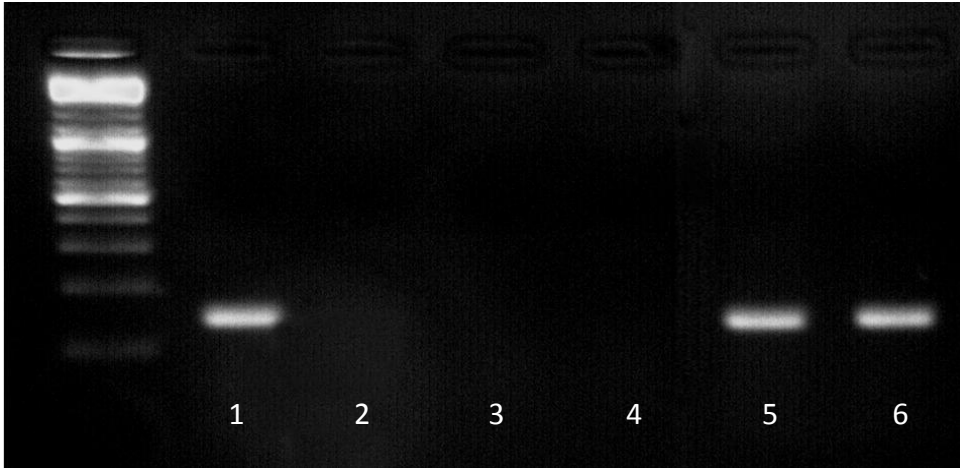

**Supplementary file S9** PCR detection of MAM gene on pILMAM plasmid (1) and on RNA extract from small intestine enterocytes of mice fed with pILMAM *L. lactis* (2); RT-PCR for MAM gene detection in small intestine enterocytes (3) and large intestine enterocytes (4) of mice fed with pILEmpty *L. lactis* and in small intestine enterocytes (5) and large intestine enterocytes (6) of mice fed with pILMAM *L. lactis*

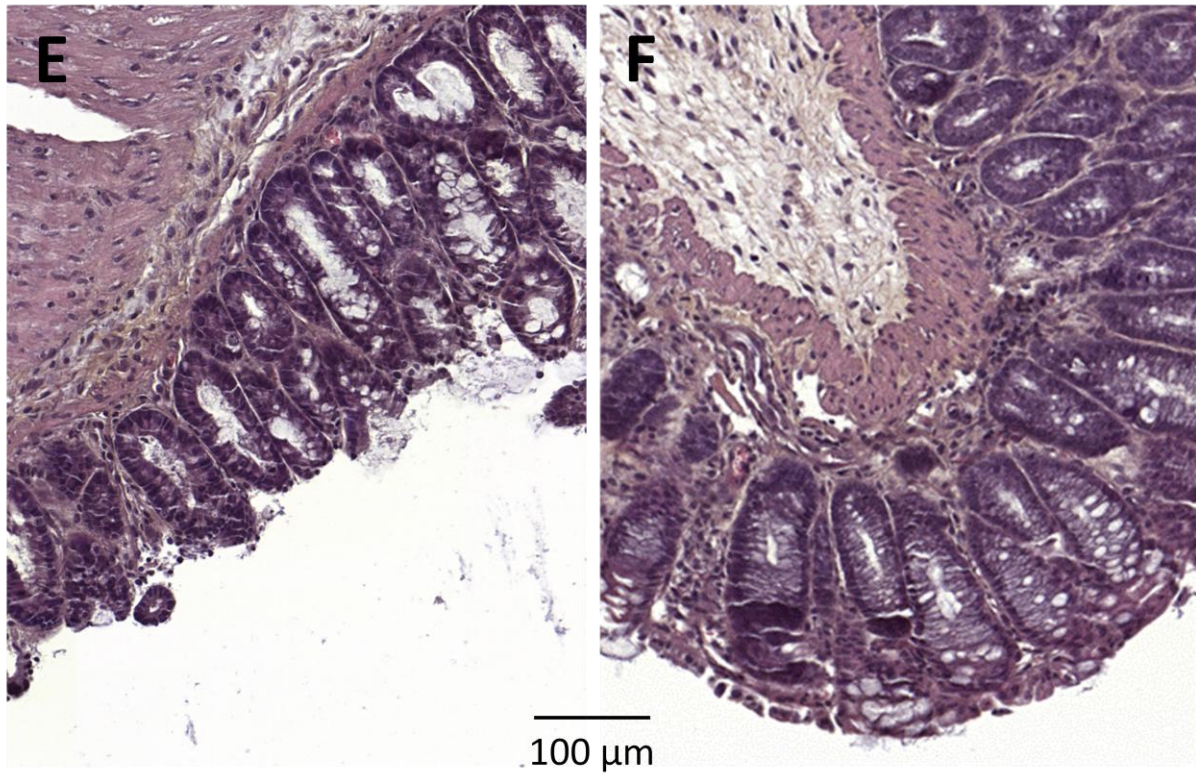

**Supplementary file S10.** No histological differences have been observed between colon sample of mice fed with *L. lactis* pILMAM and colon sample of mice fed with *L. lactis* pILEMPTY. Histological scores have been done under Ameho criteria
